# Supplementary material for: ECMO Predictors of Mortality: A 10-Year Referral Centre Experience
Source: MDPI journal article supplement (doi:10.3390/jcm11051224), 2022-02-24
Supplement: s1 [file s1]

Article

# ECMO Predictors of Mortality: A 10-Year Referral Centre Experience

Benedikt Trembl, Robert Breitkopf, Zoran Bukumirić, Mirjam Bachler, Johannes Boesch and Sasa Rajsic \*

## Supplementary material

Supplementary Figure S1. Comparison of patients based on the ICU admission reason and all-cause three-month mortality ( $n = 358$ ).

Supplementary Figure S2. Kaplan-Meier estimate of all-cause three-month mortality ( $n = 358$ , Mean 59.5, 95% CI 55.5-63.5).

Supplementary Table S1. Laboratory parameters within 24h prior to ECMO initiation ( $n = 358$ )

Supplementary Table S2. Subgroup analysis: ECMO initiation on working day or weekend; baseline demographic and clinical characteristics ( $n = 358$ )

Supplementary Table S3. Selected demographic and clinical characteristics of patients according to the ECMO indication ( $n = 358$ )

Supplementary Table S4. Veno-arterial ECMO configuration: baseline demographic and clinical characteristics ( $n = 283$ , all-cause three-month mortality)

Supplementary Table S5. Veno-venous ECMO configuration: baseline demographic and clinical characteristics ( $n = 75$ , all-cause three-month mortality)

Supplementary Table S6. Risk factors for mortality within three months from ECMO initiation: univariate cox regression analyses ( $n = 358$ )

**Supplementary Figure S1.** Comparison of patients based on the ICU admission reason and all-cause three-month mortality ( $n = 358$ ). Blue colour: survivors,  $n = 213$ ; red colour: non-survivors,  $n = 145$ . Abbreviations: ICU, intensive care unit; CPR, cardiopulmonary resuscitation; CABG, Coronary artery bypass graft; STEMI, ST-elevation myocardial infarction; ARDS, Acute respiratory distress syndrome.

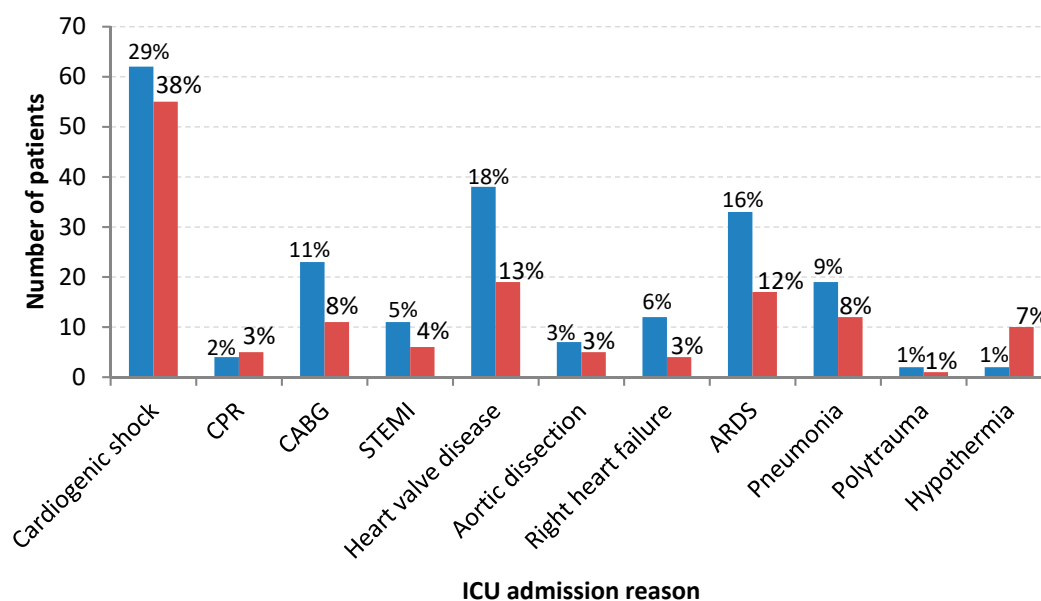

**Supplementary Figure S2.** Kaplan-Meier estimate of all-cause three-month mortality ( $n = 358$ , mean 59.5, 95% CI 55.5-63.5).

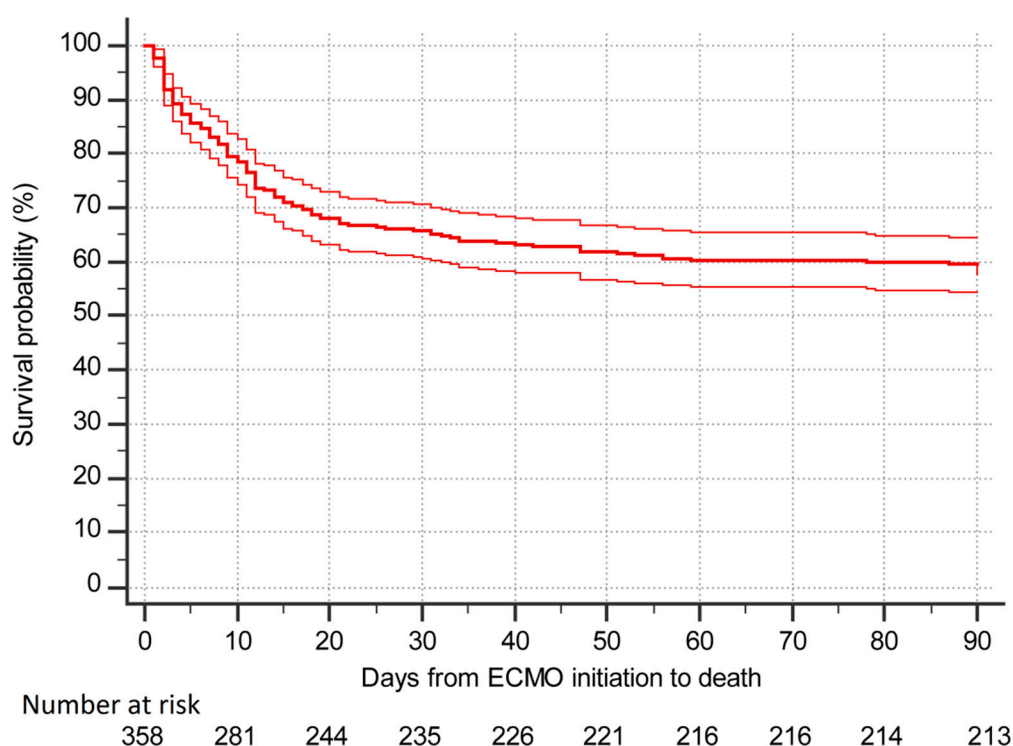

**Supplementary Table S1.** Laboratory parameters within 24h prior to ECMO initiation ( $n = 358$ )

| Laboratory parameters*                       | All patients<br>( $n = 358$ ) | Survivors<br>( $n = 213$ ) | Non-survivors<br>( $n = 145$ ) | p-value | Missing data<br>( $n/\text{total}$ ) |
|----------------------------------------------|-------------------------------|----------------------------|--------------------------------|---------|--------------------------------------|
| Haemoglobin (g/dL)                           | 118.9 $\pm$ 24.6              | 120.8 $\pm$ 25.3           | 115.6 $\pm$ 23.2               | 0.125   | 27/358                               |
| Red blood cells (T/L)                        | 4.0 $\pm$ 0.8                 | 4.0 $\pm$ 0.8              | 3.9 $\pm$ 0.8                  | 0.212   | 27/358                               |
| Haematocrit (%)                              | 0.4 $\pm$ 0.1                 | 0.4 $\pm$ 0.1              | 0.3 $\pm$ 0.1                  | 0.250   | 27/358                               |
| Leucocytes (g/L)                             | 9.4 (2.2-51.5)                | 9.0 (2.2-39.4)             | 9.8 (3.7-51.5)                 | 0.129   | 27/358                               |
| C-reactive protein (mg/L)                    | 1.6 (0.1-50.8)                | 1.3 (0.1-48.2)             | 3.0 (0.1-50.8)                 | 0.021   | 27/358                               |
| Procalcitonin ( $\mu$ g/L)                   | 1.1 (0.1-125.9)               | 1.2 (0.1-125.9)            | 1.0 (0.1-46.2)                 | 0.788   | 53/358                               |
| Platelets (g/L)                              | 166 (18-464)                  | 176 (29-464)               | 154 (18-423)                   | 0.275   | 27/358                               |
| International normalized ratio               | 1.1 (0.9-6)                   | 1.1 (0.9-6)                | 1.2 (0.9-6)                    | 0.128   | 32/358                               |
| Activated partial<br>thromboplastin time (s) | 37 (24-201)                   | 37 (24-201)                | 37 (24-201)                    | 0.310   | 47/358                               |
| Prothrombin time (%)                         | 80 (9-114)                    | 81 (9-114)                 | 75 (10-111)                    | 0.228   | 47/358                               |
| Fibrinogen (mg/dL)                           | 353 (57-1104)                 | 336 (57-1104)              | 370 (69-1055)                  | 0.141   | 31/358                               |
| Antithrombin (%)                             | 79 (15-121)                   | 81 (21-117)                | 78 (15-121)                    | 0.872   | 145/358                              |
| Factor XIII (%)                              | 66 (28-109)                   | 69 (28-109)                | 55 (39-97)                     | 0.211   | 311/358                              |
| InTEM Clotting Time (s)                      | 183 (86-354)                  | 201 (143-354)              | 176 (86-228)                   | 0.028   | 316/358                              |
| InTEM Maximum Clot<br>Firmness (mm)          | 56 (36-74)                    | 56 (39-72)                 | 61 (36-74)                     | 0.740   | 316/358                              |
| FibTEM Maximum Clot<br>Firmness (mm)         | 17 (5-34)                     | 18 (5-30)                  | 15 (7-34)                      | 1.000   | 315/358                              |

\*Data presented as mean  $\pm$  standard deviation or median (minimum – maximum range). Abbreviations: ECMO: extracorporeal membrane oxygenation.

**Supplementary Table S2.** Subgroup analysis: ECMO initiation on working day or weekend; baseline demographic and clinical characteristics ( $n = 358$ )

| Characteristics*                     | Working day<br>( $n=289$ ) | Weekend<br>( $n=69$ ) | p-value | Missing data<br>( $n$ /total) |
|--------------------------------------|----------------------------|-----------------------|---------|-------------------------------|
| Age (years)                          | 59.4 $\pm$ 15.7            | 55.7 $\pm$ 16.6       | 0.083   | 0/358                         |
| Male sex                             | 203 (70.2)                 | 48 (69.6)             | 1.000   | 0/358                         |
| Body mass index (kg/m <sup>2</sup> ) | 27.3 $\pm$ 5.5             | 26.8 $\pm$ 4.1        | 0.389   | 10/358                        |
| SOFA score                           | 12 (2-21)                  | 12 (3-20)             | 0.760   | 0/358                         |
| SAPS III Score                       | 65 (28-117)                | 70 (34-104)           | 0.036   | 1/358                         |
| CPR before ECMO initiation           | 49 (17.0)                  | 16 (23.2)             | 0.228   | 0/358                         |
| ECMO duration (days)                 | 6 (1-36)                   | 6 (2-36)              | 0.565   | 0/358                         |
| ICU length of stay (days)            | 17 (1-170)                 | 18 (2-98)             | 0.401   | 0/358                         |
| Admission reason                     |                            |                       |         | 0/358                         |
| Respiratory disease                  | 65 (22.5)                  | 16 (23.2)             | 0.543   |                               |
| Cardiac non-surgical                 | 147 (50.9)                 | 40 (58.0)             |         |                               |
| Cardiac surgery                      | 65 (22.5)                  | 10 (14.5)             |         |                               |
| Trauma                               | 3 (1.0)                    | 0 (0.0)               |         |                               |
| Hypothermia                          | 9 (3.1)                    | 3 (4.3)               |         |                               |
| Reason for ECMO support termination  |                            |                       |         | 0/358                         |
| Improvement                          | 206 (71.3)                 | 46 (66.7)             | 0.278   |                               |
| Death                                | 59 (20.4)                  | 20 (29.0)             |         |                               |
| Successful bridging                  | 15 (5.2)                   | 3 (4.3)               |         |                               |
| Haemorrhage                          | 9 (3.1)                    | 0 (0.0)               |         |                               |
| Complications                        |                            |                       |         | 0/358                         |
| Haemorrhage                          | 136 (47.1)                 | 24 (34.8)             | 0.080   |                               |
| Thrombosis                           | 64 (22.1)                  | 18 (26.1)             | 0.524   |                               |
| Sepsis                               | 56 (19.4)                  | 15 (21.7)             | 0.737   |                               |
| Mortality-related outcomes           |                            |                       |         | 0/358                         |
| Death on ECMO                        | 61 (21.1)                  | 20 (29.0)             | 0.199   |                               |
| ICU-mortality                        | 100 (34.6)                 | 31 (44.9)             | 0.126   |                               |
| 3-months mortality                   | 108 (37.4)                 | 37 (53.6)             | 0.020   |                               |
| 1-year mortality                     | 114 (39.4)                 | 38 (55.1)             | 0.021   |                               |
| Cause of death                       |                            |                       |         | 0/358                         |
| Multiple organ failure               | 34 (31.5)                  | 10 (27.0)             | 0.198   |                               |
| Cardiac cause                        | 39 (36.1)                  | 10 (27.0)             |         |                               |
| Respiratory failure                  | 5 (4.6)                    | 2 (5.4)               |         |                               |
| Sepsis                               | 12 (11.1)                  | 2 (5.4)               |         |                               |
| Brain death                          | 15 (13.9)                  | 9 (24.3)              |         |                               |
| Other                                | 3 (2.8)                    | 4 (10.8)              |         |                               |

\*Data presented as mean  $\pm$  standard deviation, median (minimum – maximum range) or number of patients (%). Abbreviations: SAPS III, simplified acute physiology score III; SOFA, sequential organ failure assessment score; ICU, intensive care unit; ECMO, extracorporeal membrane oxygenation; CPR, cardiopulmonary resuscitation.

**Supplementary Table S3.** Selected demographic and clinical characteristics of patients according to the ECMO indication ( $n = 358$ )

| Patient characteristics*                     | Cardiac shock<br>( $n = 258$ ) | Respiratory failure<br>( $n = 88$ ) | Hypothermia<br>( $n = 12$ ) | p-value <sup>1</sup> | CS vs RF | CS vs HT | RF vs HT | Missing data<br>( $n$ /total) |
|----------------------------------------------|--------------------------------|-------------------------------------|-----------------------------|----------------------|----------|----------|----------|-------------------------------|
| Age (years)                                  | 62.8 $\pm$ 13.7                | 48.6 $\pm$ 16.4                     | 42.3 $\pm$ 16.0             | <0.001               | <0.001   | <0.001   | 0.333    | 0/358                         |
| Male sex                                     | 174 (67.4)                     | 70 (79.6)                           | 7 (58.3)                    | 0.067                | -        | -        | -        | 0/358                         |
| Body mass index (kg/m <sup>2</sup> )         | 27.0 $\pm$ 4.6                 | 28.3 $\pm$ 6.8                      | 24.3 $\pm$ 1.5              | 0.019                | 0.094    | 0.195    | 0.046    | 10/358                        |
| SOFA score                                   | 12 (2-20)                      | 12 (3-21)                           | 13 (10-17)                  | 0.332                | -        | -        | -        | 0/358                         |
| SAPS III Score                               | 66 (28-104)                    | 67 (31-117)                         | 78 (58-89)                  | 0.009                | 0.579    | 0.011    | 0.073    | 1/358                         |
| ECMO duration (days)                         | 6 (1-17)                       | 8 (1-36)                            | 3 (1-25)                    | <0.001               | <0.001   | 0.069    | <0.001   | 0/358                         |
| ICU length of stay                           | 6 (1-17)                       | 20 (2-98)                           | 3 (1-53)                    | <0.001               | 0.163    | 0.004    | <0.001   | 0/358                         |
| CPR before ECMO initiation                   | 53 (20.5)                      | 7 (7.9)                             | 5 (41.6)                    | 0.003                | 0.006    | 0.063    | 0.003    | 0/358                         |
| Weekend                                      | 50 (19.4)                      | 16 (18.0)                           | 3 (25.0)                    | 0.851                | -        | -        | -        | 0/358                         |
| Complications and mortality-related outcomes |                                |                                     |                             |                      |          |          |          | 0/358                         |
| Death on ECMO                                | 54 (20.9)                      | 21 (23.6)                           | 6 (50.0)                    | 0.060                | -        | -        | -        |                               |
| ICU – mortality                              | 95 (36.8)                      | 26 (29.6)                           | 10 (83.3)                   | 0.001                | 0.296    | 0.002    | 0.024    |                               |
| In-hospital mortality                        | 103 (39.9)                     | 29 (33.0)                           | 10 (83.3)                   | 0.004                | 0.256    | 0.001    | 0.005    |                               |
| 3-months mortality                           | 105 (40.7)                     | 30 (34.1)                           | 10 (83.3)                   | 0.005                | 0.312    | 0.005    | 0.003    |                               |
| One-year mortality                           | 111 (43.0)                     | 31 (35.2)                           | 10 (83.3)                   | 0.006                | 0.212    | 0.007    | 0.003    |                               |
| Bleeding event                               | 121 (46.9)                     | 35 (39.3)                           | 4 (33.3)                    | 0.369                | -        | -        | -        |                               |
| Major bleeding event                         | 71 (27.5)                      | 24 (27.0)                           | 1 (8.3)                     | 0.401                | -        | -        | -        |                               |
| Thrombosis                                   | 62 (24.0)                      | 18 (20.2)                           | 2 (16.7)                    | 0.688                | -        | -        | -        |                               |
| Sepsis                                       | 33 (12.8)                      | 37 (41.6)                           | 1 (8.3)                     | <0.001               | <0.001   | 1.000    | 0.048    |                               |
| Cause of death                               |                                |                                     |                             |                      |          |          |          | 0/358                         |
| Multiple organ failure                       | 30 (28.6)                      | 13 (41.9)                           | 1 (8.3)                     |                      |          |          |          |                               |
| Cardiac decompensation                       | 47 (44.8)                      | 2 (6.5)                             | 0 (0.0)                     |                      |          |          |          |                               |
| Respiratory failure                          | 2 (1.9)                        | 5 (16.1)                            | 0 (0.0)                     |                      |          |          |          |                               |
| Sepsis                                       | 6 (5.7)                        | 6 (19.4)                            | 2 (16.7)                    | <0.001               | <0.001   | 0.001    | 0.034    |                               |
| Brain death                                  | 14 (13.3)                      | 4 (12.9)                            | 7 (58.3)                    |                      |          |          |          |                               |
| Other                                        | 6 (5.7)                        | 1 (3.2)                             | 0 (0.0)                     |                      |          |          |          |                               |

\*Data presented as mean  $\pm$  standard deviation, median (minimum – maximum range) or number of patients (%). P-value<sup>1</sup>: cardiac shock versus respiratory failure versus hypothermia. Abbreviations: CS: cardiac shock; RF: respiratory failure, HT: hypothermia; SAPS III, simplified acute physiology score III; SOFA, sequential organ failure assessment score; ICU, intensive care unit; ECMO, extracorporeal membrane oxygenation; CPR, cardiopulmonary resuscitation.

**Supplementary Table S4.** Veno-arterial ECMO configuration: baseline demographic and clinical characteristics ( $n = 283$ , all-cause three-month mortality)

| Patient characteristics*                             | All patients<br>( $n = 283$ ) | Survivors<br>( $n = 164$ ) | Non-survivors<br>( $n = 119$ ) | p-value | Missing data<br>( $n$ /total) |
|------------------------------------------------------|-------------------------------|----------------------------|--------------------------------|---------|-------------------------------|
| Age (years)                                          | 61.4 $\pm$ 14.8               | 61.0 $\pm$ 14.5            | 61.9 $\pm$ 15.2                | 0.617   | 0/283                         |
| Male sex                                             | 190 (67.1)                    | 112 (68.3)                 | 78 (65.5)                      | 0.627   | 0/283                         |
| SAPS III score                                       | 66 (28-104)                   | 60 (28-97)                 | 73 (41-104)                    | <0.001  | 1/283                         |
| SOFA score                                           | 12 (2-20)                     | 11 (3-19)                  | 12 (2-20)                      | 0.015   | 0/283                         |
| CPR before ECMO initiation                           | 59 (20.8)                     | 25 (15.2)                  | 34 (28.6)                      | 0.006   | 0/283                         |
| Length of ICU stay (days)                            | 16 (1-170)                    | 21 (6-170)                 | 9 (1-79)                       | <0.001  | 0/283                         |
| ICU admission reason                                 |                               |                            |                                |         | 0/283                         |
| Respiratory failure                                  | 13 (4.6)                      | 6 (3.7)                    | 7 (5.9)                        |         |                               |
| Cardiac non-surgical                                 | 182 (64.3)                    | 105 (64.0)                 | 77 (64.7)                      |         |                               |
| Cardiac surgery                                      | 75 (26.5)                     | 50 (30.5)                  | 25 (21.0)                      | 0.016   |                               |
| Trauma                                               | 1 (0.4)                       | 1 (0.6)                    | 0 (0.0)                        |         |                               |
| Hypothermia                                          | 12 (4.2)                      | 2 (1.2)                    | 10 (8.4)                       |         |                               |
| Mortality related outcomes                           |                               |                            |                                |         | 0/283                         |
| ECMO initiation to death (days)                      | 9 (1-79)                      | -                          | -                              |         |                               |
| Death during ICU                                     | 109 (38.5)                    |                            |                                |         |                               |
| Discharged alive                                     | 166 (58.7)                    | -                          | -                              |         |                               |
| ECMO support indications                             |                               |                            |                                |         | 0/283                         |
| Cardiogenic shock                                    | 258 (91.2)                    | 153 (93.3)                 | 105 (88.2)                     |         |                               |
| Respiratory failure                                  | 13 (4.6)                      | 9 (5.5)                    | 4 (3.4)                        | 0.010   |                               |
| Hypothermia                                          | 12 (4.2)                      | 2 (1.2)                    | 10 (8.4)                       |         |                               |
| ECMO related clinical course                         |                               |                            |                                |         | 0/283                         |
| ECMO support duration (days)                         | 6 (1-25)                      | 6 (1-25)                   | 5 (1-25)                       | 0.284   |                               |
| Time from admission to ECMO initiation (days)        | 0 (0-20)                      | 0 (0-9)                    | 0 (0-20)                       | 0.734   |                               |
| Day of ECMO support initiation                       |                               |                            |                                |         | 0/283                         |
| Week day                                             | 226 (79.9)                    | 140 (85.4)                 | 86 (72.3)                      |         |                               |
| Weekend                                              | 57 (20.1)                     | 24 (14.6)                  | 33 (27.7)                      | 0.007   |                               |
| Anticoagulation during ECMO support                  |                               |                            |                                |         | 1/283                         |
| UFH                                                  | 217 (76.7)                    | 135 (82.3)                 | 82 (68.9)                      |         |                               |
| Argatroban                                           | 26 (9.2)                      | 14 (8.5)                   | 12 (10.1)                      |         |                               |
| Argatroban and epoprostenol                          | 4 (1.4)                       | 1 (0.6)                    | 3 (2.5)                        | 0.025   |                               |
| None                                                 | 36 (12.7)                     | 14 (8.5)                   | 22 (18.5)                      |         |                               |
| Reason for ECMO support termination                  |                               |                            |                                |         | 0/283                         |
| Improvement (weaned)                                 | 196 (69.3)                    | 147 (89.6)                 | 49 (41.2)                      |         |                               |
| Bridge to other assistance (heart transplant or VAD) | 18 (6.4)                      | 16 (9.8)                   | 2 (1.7)                        |         |                               |
| Haemorrhage                                          | 6 (2.1)                       | 1 (0.6)                    | 5 (4.2)                        | <0,001  |                               |
| Death                                                | 63 (22.3)                     | -                          | 63 (52.9)                      |         |                               |
| Complications                                        |                               |                            |                                |         | 0/283                         |
| Haemorrhage                                          | 130 (54.1)                    | 62 (37.8)                  | 68 (57.1)                      | 0.001   |                               |
| Major haemorrhage                                    | 75 (26.5)                     | 32 (19.5)                  | 43 (36.1)                      | 0.002   |                               |
| Minor haemorrhage                                    | 55 (19.4)                     | 30 (18.3)                  | 25 (21.0)                      | 0.569   |                               |
| Day of haemorrhage                                   | 1 (1-18)                      | 1 (1-14)                   | 1 (1-18)                       | 0.865   |                               |
| Coagulopathy                                         | 32 (11.3)                     | 14 (8.5)                   | 18 (15.1)                      | 0.084   |                               |
| Thrombosis                                           | 67 (23.7)                     | 39 (23.8)                  | 28 (23.5)                      | 0.961   |                               |
| Thrombosis venous                                    | 42 (14.8)                     | 27 (16.5)                  | 15 (12.6)                      | 0.367   |                               |

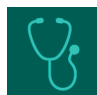

|                                                    |             |             |             |        |
|----------------------------------------------------|-------------|-------------|-------------|--------|
| Thrombosis arterial                                | 36 (12.7)   | 18 (11.0)   | 18 (15.1)   | 0.301  |
| Sepsis                                             | 36 (12.7)   | 15 (9.1)    | 21 (17.6)   | 0.034  |
| Substitution of blood products during ECMO support |             |             |             | 17/283 |
| Packed red blood cells (units)                     | 6 (0-60)    | 6 (0-36)    | 8 (0-60)    | 0.017  |
| Fresh-frozen plasma (units)                        | 0 (0-92)    | 0 (0-40)    | 0 (0-92)    | 0.037  |
|                                                    | 4.1 ±9.4    | 3.2 ±7.3    | 5.3 ±11.7   |        |
| Platelets (units)                                  | 1 (0-22)    | 1 (0-10)    | 1 (0-22)    | 0.064  |
| Fibrinogen (g)                                     | 0 (0-26)    | 0 (0-16)    | 0 (0-26)    | 0.020  |
|                                                    | 3.1 ±4.8    | 2.5 ±3.9    | 4.1 ±5.5    |        |
| Antithrombin (IU)                                  | 0 (0-17266) | 0 (0-17266) | 0 (0-15500) | 0.679  |
| Prothrombin complex concentrate (IU)               | 0 (0-7200)  | 0 (0-3600)  | 0 (0-7200)  | 0.011  |
|                                                    | 493 ±1095   | 308 ±745    | 747 ±1410   |        |
| Factor XIII concentrate (IU)                       | 0 (0-10000) | 0 (0-6250)  | 0 (0-10000) | 0.264  |
| Desmopressin (µg)                                  | 0 (0-30)    | 0 (0-30)    | 0 (0-30)    | 0.788  |
| Von Willebrand Factor (IU)                         | 0 (0-5000)  | 0 (0-5000)  | 0 (0-4000)  | 0.007  |
|                                                    | 88 ±501     | 43 ±420     | 151 ±591    |        |

\*Data presented as mean ± standard deviation, median (minimum – maximum range) or number of patients (%). For clarity, mean and standard deviation added if median is 0 and p<0.05. Abbreviations: ECMO, extracorporeal membrane oxygenation; SAPS III, simplified acute physiology score III; SOFA, sequential organ failure assessment score; ICU, intensive care unit; ECMO, extracorporeal membrane oxygenation; CPR, cardiopulmonary resuscitation; UFH, Unfractionated Heparin, VAD, ventricular assist device, IU, international units.

**Supplementary Table S5.** Veno-venous ECMO configuration: baseline demographic and clinical characteristics (*n* = 75, all-cause three-month mortality)

| Patient characteristics*                      | All patients<br>( <i>n</i> = 75) | Survivors<br>( <i>n</i> = 49) | Non-survivors<br>( <i>n</i> = 26) | p-value | Missing data<br>( <i>n</i> /total) |
|-----------------------------------------------|----------------------------------|-------------------------------|-----------------------------------|---------|------------------------------------|
| Age (years)                                   | 48.2 ±16.0                       | 46.1 ±15.5                    | 52.1 ±16.6                        | 0.135   | 0/75                               |
| Male sex                                      | 61 (81.3)                        | 39 (79.6)                     | 22 (84.6)                         | 0.759   | 0/75                               |
| SAPS III score                                | 67 (31-117)                      | 66 (35-112)                   | 73 (31-117)                       | 0.037   | 0/75                               |
| SOFA score                                    | 12 (3-21)                        | 12 (3-21)                     | 13 (3-21)                         | 0.053   | 0/75                               |
| CPR before ECMO initiation                    | 6 (8.0)                          | 6 (12.2)                      | 0 (0.0)                           | 0.087   | 0/75                               |
| Length of ICU stay (days)                     | 20 (9-98)                        | 21 (10-98)                    | 18 (2-49)                         | 0.032   | 0/75                               |
| ICU admission reason                          |                                  |                               |                                   |         | 0/75                               |
| Respiratory failure                           | 68 (90.7)                        | 46 (93.9)                     | 22 (84.6)                         | 0.413   |                                    |
| Cardiac non-surgical                          | 5 (6.7)                          | 2 (4.1)                       | 3 (11.5)                          |         |                                    |
| Trauma                                        | 2 (2.7)                          | 1 (2.0)                       | 1 (3.8)                           |         |                                    |
| Mortality related outcomes                    |                                  |                               |                                   |         | 0/75                               |
| Admission to death (days)                     | 18 (2-88)                        | -                             | -                                 | 0.381   |                                    |
| ECMO initiation to death (days)               | 14 (1-87)                        | -                             | -                                 |         |                                    |
| Death during ICU                              | 22 (29.3)                        | -                             | 22 (84.6)                         |         |                                    |
| Survived beyond ECMO support                  | 57 (76.0)                        | -                             | -                                 |         |                                    |
| Discharged alive                              | 50 (66.7)                        | -                             | -                                 |         |                                    |
| ECMO related clinical course                  |                                  |                               |                                   |         | 0/75                               |
| ECMO support duration (days)                  | 9 (1-36)                         | 8 (1-36)                      | 11 (1-36)                         | 0.029   |                                    |
| Time from admission to ECMO initiation (days) | 0 (0-36)                         | 0 (0-9)                       | 0 (0-36)                          |         |                                    |
|                                               | 1.5 ±4.9                         | 0.7 ±1.9                      | 3.0 ±7.7                          |         |                                    |
| Day of ECMO support initiation                |                                  |                               |                                   |         | 0/75                               |
| Week day                                      | 63 (84.0)                        | 41 (83.7)                     | 22 (84.6)                         | 0.007   |                                    |
| Weekend                                       | 12 (16.0)                        | 8 (16.3)                      | 4 (15.4)                          |         |                                    |
| Anticoagulation during ECMO support           |                                  |                               |                                   |         | 0/75                               |
| UFH                                           | 61 (82.4)                        | 41 (83.7)                     | 20 (80.0)                         | 0.324   |                                    |



|                                                    |             |             |            |        |
|----------------------------------------------------|-------------|-------------|------------|--------|
| Argatroban                                         | 6 (8.1)     | 5 (10.2)    | 1 (4.0)    |        |
| Epoprostenol                                       | 1 (1.4)     | 0 (0.0)     | 1 (4.0)    |        |
| Argatroban and epoprostenol                        | 1 (1.4)     | 1 (2.0)     | 0 (0.0)    |        |
| None                                               | 5 (6.8)     | 2 (4.1)     | 3 (12.0)   |        |
| Reason for ECMO support termination                |             |             |            | 0/75   |
| Improvement (weaned)                               | 56 (74.7)   | 48 (98.0)   | 8 (30.8)   |        |
| Haemorrhage                                        | 1 (1.3)     | 1 (2.0)     | 0 (0.0)    | <0.001 |
| Death                                              | 18 (24.0)   | -           | 18 (69.2)  |        |
| Complications                                      |             |             |            | 0/75   |
| Haemorrhage                                        | 30 (40.0)   | 17 (34.7)   | 13 (50.0)  | 0.198  |
| Major haemorrhage                                  | 21 (28.0)   | 11 (22.4)   | 10 (38.5)  | 0.142  |
| Minor haemorrhage                                  | 9 (12.0)    | 6 (12.2)    | 3 (11.5)   | 0.929  |
| Day of haemorrhage                                 | 4 (1-18)    | 5 (1-18)    | 4 (1-11)   | 0.536  |
| Coagulopathy                                       | 14 (18.7)   | 8 (16.3)    | 6 (23.1)   | 0.540  |
| Thrombosis                                         | 15 (20.0)   | 9 (18.4)    | 6 (23.1)   | 0.627  |
| Thrombosis venous                                  | 14 (18.7)   | 9 (18.4)    | 5 (19.2)   | 0.927  |
| Thrombosis arterial                                | 4 (5.3)     | 1 (2.0)     | 3 (11.5)   | 0.117  |
| Sepsis                                             | 35 (46.7)   | 18 (36.7)   | 17 (65.4)  | 0.018  |
| Substitution of blood products during ECMO support |             |             |            | 9/75   |
| Packed red blood cells (units)                     | 4 (0-33)    | 2 (0-31)    | 8 (0-33)   | 0.001  |
| Fresh-frozen plasma (units)                        | 0 (0-10)    | 0 (0-6)     | 0 (0-10)   | 0.981  |
| Platelets (units)                                  | 0 (0-30)    | 0 (0-30)    | 1 (0-12)   | 0.015  |
|                                                    | 2.1 ±4.7    | 1.9 ±5.2    | 2.4 ±3.6   |        |
| Fibrinogen (g)                                     | 0 (0-22)    | 0 (0-20)    | 0 (0-22)   | 0.135  |
| Antithrombin (IU)                                  | 0 (0-32000) | 0 (0-32000) | 0 (0-9500) | 0.453  |
| Prothrombin complex concentrate (IU)               | 0 (0-4500)  | 0 (0-2000)  | 0 (0-4500) | 0.334  |
| Factor XIII concentrate (IU)                       | 0 (0-6750)  | 0 (0-5000)  | 0 (0-6750) | 0.104  |
| Desmopressin (µg)                                  | 0 (0-30)    | 0 (0-30)    | 0 (0-30)   | 0.961  |
| Von Willebrand Factor (IU)                         | 0 (0-4000)  | 0 (0-4000)  | 0 (0-2000) | 0.837  |

\*Data presented as mean ± standard deviation, median (minimum – maximum range) or number of patients (%). For clarity, mean and standard deviation added if median is 0 and p<0.05. Abbreviations: ECMO, extracorporeal membrane oxygenation; SAPS III, simplified acute physiology score III; SOFA, sequential organ failure assessment score; ICU, intensive care unit; ECMO, extracorporeal membrane oxygenation; CPR, cardiopulmonary resuscitation; UFH, Unfractionated Heparin, VAD, ventricular assist device, IU, international units.

**Supplementary Table S6.** Risk factors for mortality within three months from ECMO initiation: univariate cox regression analyses (*n* = 358)

| Nondependent variable*    | B-coefficient | P-value | HR   | 95% confidence interval |       |
|---------------------------|---------------|---------|------|-------------------------|-------|
|                           |               |         |      | lower                   | upper |
| Age (years)               | 0.009         | 0.121   | 1.01 | 1.00                    | 1.02  |
| Sex (male/female)         | 0.048         | 0.789   | 1.05 | 0.74                    | 1.49  |
| Height (cm)               | -1.230        | 0.139   | 0.29 | 0.06                    | 1.49  |
| Weight (kg)               | -0.002        | 0.739   | 1.00 | 1.00                    | 1.01  |
| Body mass index (kg/m2)   | 0.012         | 0.464   | 1.01 | 0.98                    | 1.04  |
| SAPS III score            | 0.039         | <0.001  | 1.04 | 1.03                    | 1.05  |
| SOFA Score                | 0.069         | 0.002   | 1.07 | 1.03                    | 1.12  |
| Reanimation before ECMO   | 0.471         | 0.016   | 1.60 | 1.09                    | 2.35  |
| ICU Department            | 0.254         | 0.126   | 1.29 | 0.93                    | 1.79  |
| Observation period (year) | -0.051        | 0.101   | 0.95 | 0.90                    | 1.01  |
| ICU length of stay        | -0.081        | <0.001  | 0.92 | 0.90                    | 0.94  |
| Type of ECMO              | -0.059        | 0.737   | 0.94 | 0.67                    | 1.33  |





|                                                                                                                                                                                                                                                                                                                                                                                                                                                                                                       |        |        |      |      |      |
|-------------------------------------------------------------------------------------------------------------------------------------------------------------------------------------------------------------------------------------------------------------------------------------------------------------------------------------------------------------------------------------------------------------------------------------------------------------------------------------------------------|--------|--------|------|------|------|
| ECMO duration                                                                                                                                                                                                                                                                                                                                                                                                                                                                                         | -0.013 | 0.457  | 0.99 | 0.95 | 1.02 |
| ECMO initiation on weekend                                                                                                                                                                                                                                                                                                                                                                                                                                                                            | 0.450  | 0.018  | 1.57 | 1.08 | 2.28 |
| Admission reason (reference category: respiratory disease)                                                                                                                                                                                                                                                                                                                                                                                                                                            |        |        |      |      |      |
| Cardiac non-surgical                                                                                                                                                                                                                                                                                                                                                                                                                                                                                  | 0.257  | 0.236  | 1.29 | 0.85 | 1.98 |
| Cardiac surgery                                                                                                                                                                                                                                                                                                                                                                                                                                                                                       | -0.009 | 0.974  | 0.99 | 0.58 | 1.69 |
| Trauma                                                                                                                                                                                                                                                                                                                                                                                                                                                                                                | 0.146  | 0.886  | 1.16 | 0.16 | 8.50 |
| Hypothermia                                                                                                                                                                                                                                                                                                                                                                                                                                                                                           | 1.518  | <0.001 | 4.57 | 2.22 | 9.40 |
| ECMO Indication (reference category: respiratory failure)                                                                                                                                                                                                                                                                                                                                                                                                                                             |        |        |      |      |      |
| Cardiogenic shock                                                                                                                                                                                                                                                                                                                                                                                                                                                                                     | 0.230  | 0.260  | 1.26 | 0.84 | 1.88 |
| Hypothermia                                                                                                                                                                                                                                                                                                                                                                                                                                                                                           | 1.521  | <0.001 | 4.58 | 2.17 | 9.65 |
| Thrombosis                                                                                                                                                                                                                                                                                                                                                                                                                                                                                            | -0.024 | 0.901  | 0.98 | 0.67 | 1.43 |
| Coagulopathy                                                                                                                                                                                                                                                                                                                                                                                                                                                                                          | 0.340  | 0.128  | 1.41 | 0.91 | 2.18 |
| Haemorrhage                                                                                                                                                                                                                                                                                                                                                                                                                                                                                           | 0.574  | 0.001  | 1.78 | 1.28 | 2.46 |
| Sepsis                                                                                                                                                                                                                                                                                                                                                                                                                                                                                                | 0.361  | 0.056  | 1.44 | 0.99 | 2.08 |
| Anticoagulation medication                                                                                                                                                                                                                                                                                                                                                                                                                                                                            | -0.258 | 0.127  | 0.77 | 0.56 | 1.08 |
| C-reactive protein (mg/dL)                                                                                                                                                                                                                                                                                                                                                                                                                                                                            | 0.014  | 0.136  | 1.01 | 0.99 | 1.03 |
| Procalcitonin (µg/L)                                                                                                                                                                                                                                                                                                                                                                                                                                                                                  | -0.014 | 0.330  | 0.99 | 0.96 | 1.01 |
| Variables with increased hazard ratio for mortality: ECMO initiation on weekend, admission due to hypothermia, reanimation before ECMO initiation, SAPS III and SOFA score, hypothermia as indication for ECMO support, haemorrhage, sepsis and ICU length of stay. Abbreviations: CI, confidence Intervals; HR, hazard ratio; SAPS III, simplified acute physiology score III; SOFA, sequential organ failure assessment score; ICU, intensive care unit; ECMO, extracorporeal membrane oxygenation. |        |        |      |      |      |
